# Supplementary material for: Realistic material property prediction using domain adaptation based machine learning
Source: Royal Society of Chemistry journal article supplement (doi:10.1039/d3dd00162h), 2023-12-22
Supplement: d3dd00162h1.pdf [file d3dd00162h1.pdf]

## Supplementary file for *Realistic material property prediction using domain adaptation based machine learning*

Jeffrey Hu, David Liu, Nihang Fu, Rongzhi Dong

December 5, 2023

### 1 Dataset preparation

We downloaded two datasets (matbench\_expt\_gap and matbench\_glass) from the Matbench site including one classification problem for glass materials, and one regression problem related to band gap prediction. We then prepare five DA test dataset using five different approaches including leave-one-cluster out (LOCO), 50 sparse samples in the X input space (SparseXSingle), 50 sparse samples in the Y (property) space (SparseYSingle), 50 sparse clusters each with 11 samples in the X input space (SparseXCluster), 50 sparse clusterse each with 11 samples in the Y (property) space (SparseYCluster). In total, we have 10 datasets for DA algorithm evaluations, including bandgap-LOCO, bandgap-SparseX, bandgap-SparseXCluster, bandgap-SparseY, and bandgap-SparseYCluster for regression and glass-LOCO, glass-SparseX, glass-SparseXCluster, glass-SparseY, and glass-SparseYCluster for classification. The test cluster statistics are shown in Table S1.

Table S1: 10 datasets for domain adaptation model evaluations

| Cluster ID | bandgap |                 |                 |                |                | glass |                 |                 |                |                |
|------------|---------|-----------------|-----------------|----------------|----------------|-------|-----------------|-----------------|----------------|----------------|
|            | LOCO    | SparseX Cluster | SparseY Cluster | SparseX Single | SparseY Single | LOCO  | SparseX Cluster | SparseY Cluster | SparseX Single | SparseY Single |
| 0          | 78      | 11              | 11              | 1              | 1              | 27    | 11              | 11              | 1              | 1              |
| 1          | 77      | 11              | 11              | 1              | 1              | 224   | 11              | 11              | 1              | 1              |
| 2          | 110     | 11              | 11              | 1              | 1              | 213   | 11              | 11              | 1              | 1              |
| 3          | 59      | 11              | 11              | 1              | 1              | 245   | 11              | 11              | 1              | 1              |
| 4          | 113     | 11              | 11              | 1              | 1              | 149   | 11              | 11              | 1              | 1              |
| 5          | 117     | 11              | 11              | 1              | 1              | 121   | 11              | 11              | 1              | 1              |
| 6          | 63      | 11              | 11              | 1              | 1              | 184   | 11              | 11              | 1              | 1              |
| 7          | 73      | 11              | 11              | 1              | 1              | 125   | 11              | 11              | 1              | 1              |
| 8          | 96      | 11              | 11              | 1              | 1              | 126   | 11              | 11              | 1              | 1              |
| 9          | 75      | 11              | 11              | 1              | 1              | 107   | 11              | 11              | 1              | 1              |
| 10         | 40      | 11              | 11              | 1              | 1              | 230   | 11              | 11              | 1              | 1              |
| 11         | 134     | 11              | 11              | 1              | 1              | 107   | 11              | 11              | 1              | 1              |
| 12         | 104     | 11              | 11              | 1              | 1              | 97    | 11              | 11              | 1              | 1              |
| 13         | 199     | 11              | 11              | 1              | 1              | 202   | 11              | 11              | 1              | 1              |
| 14         | 40      | 11              | 11              | 1              | 1              | 146   | 11              | 11              | 1              | 1              |
| 15         | 124     | 11              | 11              | 1              | 1              | 95    | 11              | 11              | 1              | 1              |
| 16         | 42      | 11              | 11              | 1              | 1              | 77    | 11              | 11              | 1              | 1              |
| 17         | 127     | 11              | 11              | 1              | 1              | 88    | 11              | 11              | 1              | 1              |
| 18         | 99      | 11              | 11              | 1              | 1              | 110   | 11              | 11              | 1              | 1              |
| 19         | 138     | 11              | 11              | 1              | 1              | 108   | 11              | 11              | 1              | 1              |
| 20         | 170     | 11              | 11              | 1              | 1              | 84    | 11              | 11              | 1              | 1              |
| 21         | 27      | 11              | 11              | 1              | 1              | 39    | 11              | 11              | 1              | 1              |
| 22         | 57      | 11              | 11              | 1              | 1              | 87    | 11              | 11              | 1              | 1              |
| 23         | 70      | 11              | 11              | 1              | 1              | 117   | 11              | 11              | 1              | 1              |
| 24         | 172     | 11              | 11              | 1              | 1              | 125   | 11              | 11              | 1              | 1              |
| 25         | 175     | 11              | 11              | 1              | 1              | 118   | 11              | 11              | 1              | 1              |
| 26         | 81      | 11              | 11              | 1              | 1              | 264   | 11              | 11              | 1              | 1              |
| 27         | 47      | 11              | 11              | 1              | 1              | 96    | 11              | 11              | 1              | 1              |
| 28         | 232     | 11              | 11              | 1              | 1              | 71    | 11              | 11              | 1              | 1              |
| 29         | 79      | 11              | 11              | 1              | 1              | 19    | 11              | 11              | 1              | 1              |
| 30         | 96      | 11              | 11              | 1              | 1              | 189   | 11              | 11              | 1              | 1              |
| 31         | 118     | 11              | 11              | 1              | 1              | 91    | 11              | 11              | 1              | 1              |
| 32         | 130     | 11              | 11              | 1              | 1              | 321   | 11              | 11              | 1              | 1              |
| 33         | 84      | 11              | 11              | 1              | 1              | 92    | 11              | 11              | 1              | 1              |
| 34         | 97      | 11              | 11              | 1              | 1              | 276   | 11              | 11              | 1              | 1              |
| 35         | 25      | 11              | 11              | 1              | 1              | 26    | 11              | 11              | 1              | 1              |
| 36         | 106     | 11              | 11              | 1              | 1              | 118   | 11              | 11              | 1              | 1              |
| 37         | 76      | 11              | 11              | 1              | 1              | 25    | 11              | 11              | 1              | 1              |
| 38         | 35      | 11              | 11              | 1              | 1              | 60    | 11              | 11              | 1              | 1              |
| 39         | 16      | 11              | 11              | 1              | 1              | 61    | 11              | 11              | 1              | 1              |
| 40         | 205     | 11              | 11              | 1              | 1              | 76    | 11              | 11              | 1              | 1              |
| 41         | 122     | 11              | 11              | 1              | 1              | 79    | 11              | 11              | 1              | 1              |
| 42         | 28      | 11              | 11              | 1              | 1              | 61    | 11              | 11              | 1              | 1              |
| 43         | 69      | 11              | 11              | 1              | 1              | 55    | 11              | 11              | 1              | 1              |
| 44         | 57      | 11              | 11              | 1              | 1              | 84    | 11              | 11              | 1              | 1              |
| 45         | 98      | 11              | 11              | 1              | 1              | 9     | 11              | 11              | 1              | 1              |
| 46         | 52      | 11              | 11              | 1              | 1              | 170   | 11              | 11              | 1              | 1              |
| 47         | 22      | 11              | 11              | 1              | 1              | 20    | 11              | 11              | 1              | 1              |
| 48         | 104     | 11              | 11              | 1              | 1              | 21    | 11              | 11              | 1              | 1              |
| 49         | 46      | 11              | 11              | 1              | 1              | 45    | 11              | 11              | 1              | 1              |
| avg        | 92.08   | 11              | 11              | 1              | 1              | 113.6 | 11              | 11              | 1              | 1              |
| min        | 16      | 11              | 11              | 1              | 1              | 9     | 11              | 11              | 1              | 1              |
| max        | 232     | 11              | 11              | 1              | 1              | 321   | 11              | 11              | 1              | 1              |

## 2 Figures

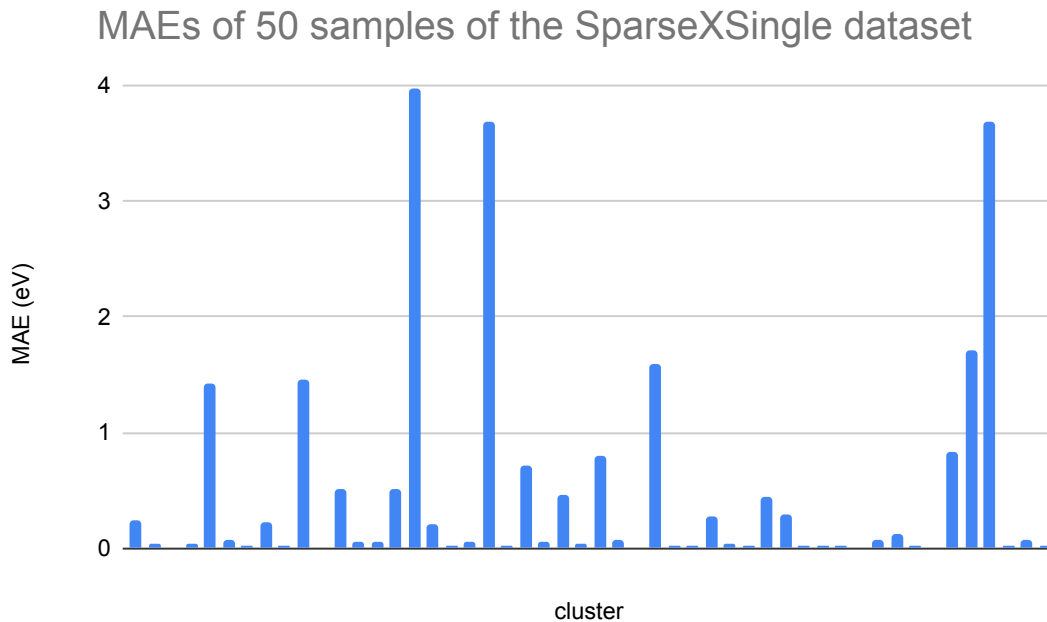

Figure S1: Distribution of the MAEs for the 50 single-sample clusters by the Roost algorithm. It shows that a few clusters/samples are extremely difficult to predict with more than 1.0 eV MAEs, which leads to high variation of the model predictions.

## 3 Tables

Table S2: How the number of fine-tuning samples affects the DA performance

| fine-tune sample # | metrics            | BW     | TransferTreeClf | RegTransferLC | TrAdaBoost | LinInt  |
|--------------------|--------------------|--------|-----------------|---------------|------------|---------|
| 3 labeled samples  | baseline avg. mae  | 0.652  | 0.644           | 0.597         | 0.658      | 0.656   |
|                    | adapt avg. mae     | 0.704  | 0.556           | 0.527         | 0.633      | 0.533   |
|                    | performance gain % | 8.03%  | -13.64%         | -11.78%       | -3.70%     | -18.74% |
| 50% of test set    | baseline avg. mae  | 0.652  | 0.632           | 0.597         | 0.658      | 0.650   |
|                    | adapt avg. mae     | 0.742  | 0.645           | 0.640         | 0.725      | 0.638   |
|                    | performance gain % | 13.86% | 2.18%           | 7.12%         | 10.20%     | -1.73%  |
